**Title:** Top predator introduction changes the effects of spatial isolation on freshwater community structure

**Authors:** Rodolfo Mei Pelinson<sup>1,\*</sup>, Mathew A. Leibold<sup>2</sup>, Luis Schiesari<sup>1,3</sup>

<sup>1</sup> Programa de Pós-Graduação em Ecologia, Instituto de Biociências, Universidade de São Paulo, São Paulo, São Paulo, Brazil.

<sup>2</sup> Department of Biology, University of Florida, Gainesville, Florida, 32611, U.S.A.

<sup>3</sup> Escola de Artes, Ciências e Humanidades, Universidade de São Paulo, São Paulo, São Paulo, Brazil.

**\*Corresponding Author:** [rodolfopelinson@gmail.com](mailto:rodolfopelinson@gmail.com)

**Running title:** Top predator changes spatial isolation effect

**Keywords:** metacommunity, community ecology, dispersal, isolation, macroinvertebrates, trophic cascade, fish introduction, Tilapia, aquaculture, freshwater ecology

Number of words in Abstract: 150

Number of words in main text: 4392

Number of references: 59

Number of figures: 4

Number of Tables: 1

1 **Abstract**

2       Spatial isolation can differentially affect the distribution of predators and thus affect lower  
3 trophic levels by resulting in trophic cascades. Similarly, the introduction of top predators into  
4 isolated ecosystems can cause the same cascading effects because they mostly prey upon larger  
5 frequently predatory taxa, indirectly benefiting consumers. Here we experimentally tested  
6 whether spatial isolation can affect the outcome and strength of the cascading effects caused by  
7 fish on macroinvertebrate community structure. We found that fish did reduce the abundance of  
8 predators but had no effect on consumers. Spatial isolation, however, did cause trophic cascades,  
9 but only in the absence of fish. We believe this happened because fish also preyed upon  
10 consumers when they increase in abundance. Additionally, and in contrast with simple  
11 theoretical expectations for metacommunities, we found that the difference between ponds with  
12 and without fish increased with isolation, probably because fish dampened the cascading effects  
13 of spatial isolation.

14           **Introduction**

15           Dispersal is a key driver of community and metacommunity structure (Mouquet & Loreau  
16 2003; Leibold *et al.* 2004; Vellend 2010; Leibold & Chase 2018). Classic metacommunity theory  
17 recognizes that the frequency and intensity of dispersal can determine the relative importance of  
18 stochasticity and niche selection in structuring metacommunities (Leibold *et al.* 2004). When  
19 mean dispersal rate among species is too low or patches are very isolated, stochastic events are  
20 likely to cause communities to drift towards multiple different states that aren't necessarily  
21 related to local environmental conditions because of the contingency of colonization history  
22 (Leibold & Chase 2018). In contrast, if dispersal rate is too high or patches are extremely highly  
23 connected, the constant arrival of migrants should override the effects of local drift or niche  
24 selection making communities more similar to each other irrespective of local environmental  
25 variation (Mouquet & Loreau 2003; Leibold & Chase 2018). Thus, niche selection processes are  
26 more likely to shape community structure in intermediate levels of dispersal rate or intermediate  
27 levels of connectivity. However, it is also important to incorporate interspecific variation in  
28 dispersal rates and not only mean dispersal rates (Levins & Culver 1971; Finlay *et al.* 2002;  
29 McCann *et al.* 2005; Shurin *et al.* 2009; Astorga *et al.* 2012; Vellend *et al.* 2014; Guzman *et al.*  
30 2019). Vellend *et al.* (2014), for example, suggested that variation in dispersal rates can reduce  
31 the effect of stochasticity because species with higher dispersal rates would always colonize a  
32 patch first, leaving less room for the establishment of different community structures. They also  
33 suggested that the consequences of niche selection on patterns of community structure would be  
34 stronger if traits that confer higher fitness within a set of local environmental conditions are  
35 positively correlated with dispersal rate.

36 Freshwater pond species can vary substantially in dispersal and colonization rates (Bilton  
37 *et al.* 2001; Shulman & Chase 2007; Chase & Shulman 2009; Shurin *et al.* 2009; Guzman *et al.*  
38 2019) and such rates can vary with trophic level among invertebrates. For example, predatory  
39 insects tend to have larger body sizes than consumers, and thus higher locomotory ability  
40 (McCann *et al.* 2005). However, predatory insects also tend to have smaller population sizes  
41 (Cohen *et al.* 2003) and longer generation times than their prey, possibly making colonization  
42 events in spatially isolated ponds rarer (Chase & Shulman 2009). Predators can also be indirectly  
43 disfavored by habitat isolation if their prey is dispersal-limited or unable to reach high population  
44 sizes (Hein & Gillooly 2011). The smaller body sizes of non-predatory insects, by contrast, may  
45 greatly expand their dispersal range by wind transport (Muehlbauer *et al.* 2014). An important  
46 outcome of this negative correlation between dispersal rate and trophic level is that spatial  
47 isolation can lead to trophic cascades, causing herbivores and detritivores to be more abundant in  
48 more isolated habitats (Shulman & Chase 2007; Chase & Shulman 2009).

49 Freshwater community structure is also strongly influenced by the presence of predatory  
50 fish (Wellborn *et al.* 1996; Howeth & Leibold 2008; Pope & Hannelly 2013). In the absence of  
51 fish, predatory invertebrates such as aquatic beetles and dragonfly larvae are often the top  
52 predators. Compared to fish they are usually less efficient, gape-limited sit-and-wait predators  
53 that consume smaller prey (Wellborn *et al.* 1996). However, when present fish, which are usually  
54 large visually oriented predators, tend to preferentially consume large prey, which frequently  
55 happens to be predatory insects (Wellborn *et al.* 1996; McCauley 2008). This can also lead to  
56 trophic cascades, causing the abundance of small herbivore and detritivore species to increase  
57 (Diehl 1992; Goyke & Hershey 1992). Humans frequently purposefully introduce fish for  
58 aquaculture to habitats that greatly vary in its degree of isolation and there is thus a possible

59 interaction between isolation and fish distributions that may determine the degree to which  
60 trophic cascades are found in a landscape of ponds.

61 Our study aimed at experimentally assessing whether and how spatial isolation can change  
62 the effects of the introduction of a generalized fish predator on freshwater community structure.  
63 We hypothesized that the presence of predatory fish would (1) promote trophic cascades because  
64 it should preferentially prey upon larger predatory insects, increasing the abundance of  
65 consumers (*i.e.* herbivores and detritivores). Additionally, (2.1) if spatial isolation promotes a  
66 similar cascade effect, by reducing the abundance of predatory insects, which frequently have  
67 lower dispersal rates, increasing isolation should intensify the effect of fish on community  
68 structure because the ecological traits that promote trophic cascades in both cases are positively  
69 correlated (*i.e.* body size and dispersal rate, respectively). (2.2) Alternatively, if spatial isolation  
70 represents a similar limitation to both predators and consumers, the effect of fish predation on  
71 community structure should be stronger at intermediate spatial isolation where dispersal rate is  
72 neither too high nor too low to override the consequences of any niche selection process, as  
73 predicted by classic metacommunity models.

74

## 75 **Methods**

76 We conducted a field experiment at the Estação Ecológica de Santa Bárbara (EESB) in  
77 Águas de Santa Bárbara, São Paulo, Brazil (22°48'59" S, 49°14'12" W). The EESB is a 2,712-ha  
78 protected area predominantly covered with open savanna phytophysionomies, with smaller  
79 portions of seasonal semideciduous forests, *Pinus* sp. and *Eucalyptus* sp plantations (Melo &  
80 Durigan 2011). Soils are sandy, and climate is Koeppen's Cwa, *i.e.*, warm temperate with dry  
81 winters and hot summers (CEPAGRI 2018). Mean annual rainfall is ~1350mm with a distinct

82 rainy season from October to March (January being the wettest month with ~200mm rainfall)  
83 and a dry season from April to September (July being the driest month with ~40mm rainfall;  
84 (CEPAGRI 2018). In the EESB the experiment was implemented in an area covered by second  
85 growth cerrado *sensu stricto*, a moderately dense, open-canopy savanna phytophysiognomy  
86 (Melo & Durigan 2011).

87 Experimental units consisted of ~1,200L artificial ponds dug into the ground and lined  
88 with a 0.5 mm thick, high-density polyethylene geomembrane to retain water. Each pond was 4  
89 m long, 1m wide and 40 cm deep. Walls were vertical along the length of the pond; 1 m-long  
90 ramps terminating at ground level at each short side of the pond provided shallow microhabitats  
91 for freshwater organisms and escape for terrestrial fauna that eventually fell into the water. Two  
92 roof tiles were placed at the waterline in each of the short sides to provide shelter and/or  
93 oviposition habitat. Three 30 cm-long, 10 cm-wide PVC pipes were placed in the water to  
94 provide shelter for fishes.

95

### 96 *Experimental design*

97 The experiment followed a fully factorial design crossing fish presence (presence/absence)  
98 with spatial isolation (three levels of isolation). The isolation treatment was achieved by  
99 establishing 8 artificial ponds along each of three parallel transects 30m, 120m and 480m from a  
100 source wetland consisting of a stream (Riacho Passarinho) and its floodplain (Fig. 1). Within  
101 each transect, the distance between adjacent artificial ponds was 30 m. The well-drained sandy  
102 soils ensured that no other ponds and puddles formed during the rainy season at our study site,  
103 which could confound our manipulation of isolation distances. Each fish-by-distance treatment  
104 was replicated four times for a total of 24 artificial ponds.

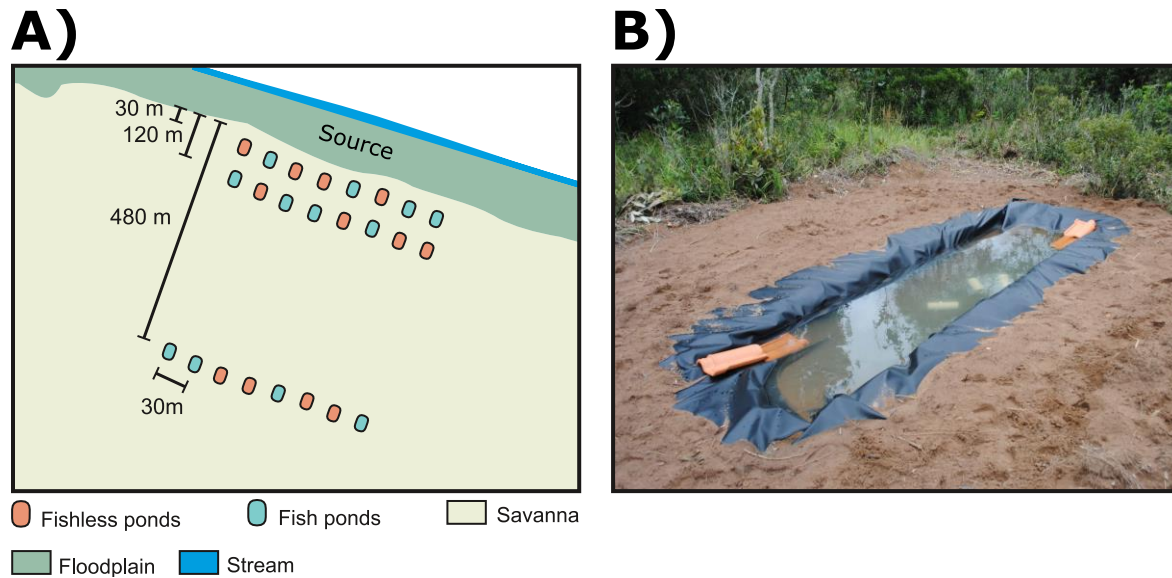

106 **Figure 1.** A. Experimental setup. B. One of the ponds during the experiment.

107

108 The experiment ran from 18-Jan-2017 to 24-Apr-2017. Between 18 and 25-Jan-2017  
109 mesocosms were filled with well water. On 28-Jan-2017 we added to each mesocosm 1000g  
110 (wet mass) of leaf litter composed of equal amounts of grass and tree leaf litter to provide  
111 structural complexity for benthic organisms. On 29-Jan-2017 we added to each mesocosm 15g of  
112 dog chow to provide an initial pulse of nutrients. The same day we added one Redbreast Tilapia  
113 (*Coptodon rendalli*, standard length  $99.2 \text{ mm} \pm 5.9 \text{ mm}$ , wet mass  $40.2 \text{ g} \pm 8.8 \text{ g}$ , mean  $\pm$  SD,  
114  $N=12$ ) per predator treatment pond, collected in a small reservoir outside the EESB.

115 The reasons for manipulating Redbreast Tilapias are twofold. First, Tilapias are hardy  
116 generalized predators (confirmed in a pilot lab experiment, see appendix 2), capable of surviving  
117 in a wide range of environmental conditions including low oxygen levels and a broad range of  
118 temperatures (Caulton 1977; Tran-Duy *et al.* 2008), conditions likely to be found in our shallow  
119 artificial ponds. Second, the Redbreast Tilapia is, along with the Nile Tilapia (*Oreochromis*  
120 *niloticus*), one of the most widely introduced fishes in the world for aquaculture and recreational

121 fisheries (Britton & Orsi 2012). These African species represented ~11% (6.1 million tons) of the  
122 entire freshwater fish production in the world and ~40% (0.6 million tons) in the Americas in  
123 2017 (FAO 2019). In Brazil, Redbreast and Nile Tilapias are found in reservoirs and lakes in  
124 most river basins, and their spread to new river basins may be a matter of time considering that  
125 their stocking is still encouraged by public policies (Zambrano *et al.* 2006; Britton & Orsi 2012;  
126 Pelicice *et al.* 2014; Daga *et al.* 2016). Indeed, a very common land management practice in rural  
127 Brazil is the construction of dugout or impounded lakes, where the Tilapia is usually the first  
128 choice of fish species for stocking.

129

### 130 *Freshwater community sampling surveys*

131 To assess the influence of fish presence, spatial isolation, and their interaction on  
132 community assembly we conducted three sampling surveys of freshwater communities after ~3  
133 weeks (18 to 23-Feb-2017), ~8 weeks (23 to 27-Mar-2017) and ~12 weeks (20 to 24-Apr-2017)  
134 of experiment. Freshwater communities were dominated by insects, which were sampled by  
135 sweeping half of the pond twice, including both pelagic and benthic habitats, with a hand net  
136 (mesh size 1.5 mm). Samples were cleaned of debris and stored in 70% ethanol. We identified  
137 and counted all aquatic macroinvertebrates to the lowest reliable taxonomical level using  
138 taxonomic keys for South American freshwater insects (Costa *et al.* 2004; Pereira *et al.* 2007;  
139 Segura *et al.* 2011; Hamada *et al.* 2014).

140 Over the course of the experiment we monitored ponds for fish survival; dead fish were  
141 replaced as soon as noticed. In the day following fish addition four fishes had died, possibly due  
142 to handling stress. One week later one more fish had died. In the following weeks, mesocosms  
143 water became turbid and it was not always possible to assess fish presence without netting.



144 Because netting could represent a considerable disturbance to freshwater communities, we  
145 waited until the end of each sampling survey to seine the ponds and thereby assess fish presence  
146 in treatment ponds. Two fishes were found to be missing by the end of the first sampling survey,  
147 two by the end of the second sampling survey and none by the end of the third sampling survey.  
148 Also, we had to exclude four ponds from the analysis in the last sampling survey because of  
149 sampling issues (see appendix 3).

150

### 151 *Data analysis*

152 To test the hypothesis that community structure is influenced by fish presence, distance to  
153 the source, and their interaction, we used a model-based approach for multivariate data where the  
154 matrix of site-by-row species abundance data represents community structures (Warton *et al.*  
155 2015a). The main advantages of model-based approaches are the possibility of accounting for the  
156 mean-variance relationship of abundance data, and the better interpretability of data.  
157 Specifically, we can assess which and how species in a community are being influenced by  
158 treatments and test for the effect of traits in their responses (Warton *et al.* 2015b). Prior to this  
159 analysis, singletons and doubletons were removed both because they are uninformative to  
160 general community patterns and because they complicate model parameter estimation (Warton *et*  
161 *al.* 2015a).

162 Because abundance data are counts, both Poisson and Negative Binomial distributions  
163 were considered. We chose the Negative Binomial distribution after concluding that there was  
164 overdispersion in our abundance data by inspecting the mean-variance relationship (appendix 4).  
165 We also tested for differences in the effect of treatments across different sampling surveys. To do  
166 that, we performed likelihood ratio tests to test if the progressive addition of terms to the model

167 provided a statistically better fit based on values of deviance. First, we tested if we had any effect  
168 of time in species abundances, then we tested if progressively adding the effect of fish, isolation,  
169 and their interaction provided a significant better fit to the data. Those tests were always assessed  
170 by comparing the best model so far against the next more complex model. After that, we tested if  
171 the effect of treatments were different across different sampling surveys by adding an interaction  
172 between the effect of time and the interaction between fish and isolation treatments. To account  
173 for correlations in species abundances when computing p-values we shuffled entire rows of the  
174 incidence matrix (ponds), keeping species abundances in the same ponds always together. To  
175 account for lack of independence between the same ponds sampled across time, ponds were  
176 considered blocks, so in each permutation step we shuffled ponds freely within blocks (*i.e.* only  
177 across time), then we shuffled the entire blocks freely (*i.e.* across fish and isolation treatments).  
178 P-values were computed using the PIT-trap bootstrap resample procedure, which operates on  
179 probability integral transform residuals (Warton *et al.* 2017). P values were from 10,000  
180 bootstrap resamples. Because we found significantly different effects of fish and isolation  
181 treatments across different sampling surveys, we repeated the analysis in each sampling surveys  
182 separately. Those analyses were implemented using functions *manyglm()* and *anova.manyglm()*  
183 from package ‘mvabund’ version 4.0.1 (Wang *et al.* 2012, 2019). To see how individual taxa,  
184 respond to the different treatments we looked at 95% confidence intervals of estimated  
185 parameters for each taxon in each treatment. To see if the trophic level (*i.e.* strict predator VS  
186 consumer) is a good predictor of the changes in community structure, we further tested if the  
187 inclusion of the categorical trait predator/consumer increases the fit of the models also  
188 performing likelihood ratio tests. We considered strict predators only the predators that were  
189 prone to prey upon other sampled macroinvertebrates. Insects that are not predators at all, that

190 prey mostly upon zooplankton, or that have only a small portion of their diet based on predation  
191 were considered consumers (see appendix 5). This trait-based approach is called the model-based  
192 fourth corner solution (Brown *et al.* 2014) and was also implemented using functions *traitglm()*  
193 and *anova.traitglm()* from package ‘mvabund’ version 4.0.1 (Wang *et al.* 2019).

194 A significant interaction between fish and isolation means that there is either or both a  
195 difference in direction or magnitude of the effect of fish in different isolation treatments (*i.e.*  
196 positive or negative effect). To specifically test for differences in the size of the effect of fish,  
197 regardless of direction, we performed a model-based unconstrained ordination via generalized  
198 linear latent variable models (GLLVM; Niku *et al.* 2017) with a negative binomial distribution  
199 using two latent variables for each of the sampling surveys (Hui *et al.* 2015). The latent variables  
200 were estimated via variational approximation (Hui *et al.* 2016). After performing the ordination,  
201 we computed the centroids of each treatment group, and the distance between the centroids of  
202 fish and fishless treatments in each isolation treatment as a measure of the size of the effect of  
203 fish. Then we tested whether this distance is significantly different across all the isolation  
204 treatments. To test for that we designed a permutation procedure to only permute ponds across  
205 isolation treatments, keeping the fish treatment constant. This represented a null scenario where  
206 the effect of fish is the same in all isolation treatments. We corrected p-values for multiple  
207 comparisons using the false discovery rate (FDR). We also used those ordinations to visualize  
208 the effect of treatments on community structure. These analyses were implemented using the  
209 function *gllvm()* from package ‘gllvm’ version 1.1.7 (Niku *et al.* 2019). All analyses were  
210 implemented in software R version 3.6.1 (R Core Team 2019). Code and data to perform  
211 reproduce the analysis and figures are available on github in the following repository:  
212 RodolfoPelinson/Pelinson\_et\_al\_2019\_Top\_predator\_isolation.

213

## 214 **Results**

215 Mesocosms were colonized by aquatic and semiaquatic insects comprising five orders and  
216 17 families (Odonata: Libellulidae, Coenagrionidae; Coleoptera: Dytiscidae, Hydrophilidae,  
217 Noteridae; Diptera: Ceratopogonidae, Chaoboridae, Chironomidae, Culicidae; Ephemeroptera:  
218 Baetidae, Caenidae, Polymitarciidae; Hemiptera: Corixidae, Gerridae, Naucoridae,  
219 Notonectidae, Veliidae). The most abundant families, with more than 200 individuals sampled in  
220 the entire experiment, were chironomids (total abundance of 11,558 individuals), veliids (1,097  
221 individuals), libellulid dragonflies (901 individuals) and culicid mosquitoes (707 individuals).  
222 The rarest families, with less than 10 individuals sampled in the entire experiment, were  
223 Gerridae, Naucoridae, Corixidae, Coenagrionidae, Ceratopogonidae and Hydrophilidae. More  
224 detailed information is available in appendix 5.

225 We analyzed each sampling survey separately because the effect of treatments on  
226 community structure changed and became clearer from the first to the last survey (Fig. 2; Table  
227 1). Therefore, here we focused on the results for the last survey. We found that there was  
228 generally a significant effect of fish, isolation and their interaction on community structure for  
229 the last surveys, and those effects were mediated by trophic level (Table 1). The presence of fish  
230 had a negative impact on the abundance of predators only at 120 and 480 m (Fig. 3 A). At 30 m  
231 *Pantala* dragonflies suffered no effect of fish and *Orthemis* dragonflies were strongly positively  
232 affected (Fig. 4 A). Consumers were not positively affected by fish by the end of the experiment  
233 (Fig. 3 A). Spatial isolation negatively affected predators from 30 to 120 and 480 m of isolation,  
234 but only in ponds with fish (Fig. 3 C and B). However, the same two predators, *Pantala* and  
235 *Orthemis* dragonflies, were actually positively affected by isolation in fishless ponds (Fig. 4 A).

236 Also, consumers were positively affected by isolation from 30 m to 120 m and 480 m of  
237 isolation, but only in fishless ponds (Fig. 3 C).

**Table 1.** Summary of likelihood ratio tests of models explaining community structure. All values of deviance within each sampling survey or all sampling surveys together are relative to the simpler model immediately above it. Bold values represent a significant improvement in model fit ( $p < 0.05$ ).

|                                                               | <b>Diff. of Degrees of Freedom</b> | <b>Deviance</b> | <b>p</b>         |
|---------------------------------------------------------------|------------------------------------|-----------------|------------------|
| <i>All Sampling Surveys</i>                                   |                                    |                 |                  |
| <b>1- Time (Compared to no effects of time or treatments)</b> | <b>2</b>                           | <b>392.8</b>    | <b>&lt;0.001</b> |
| <b>2 - Time + Fish (Compared to model 1)</b>                  | <b>1</b>                           | <b>89.2</b>     | <b>&lt;0.001</b> |
| <b>3 - Time + Fish + Isolation (Compared to model 2)</b>      | <b>2</b>                           | <b>109.2</b>    | <b>0.001</b>     |
| <b>4 - Time + (Fish * Isolation) - Compared to model 3</b>    | <b>2</b>                           | <b>120.3</b>    | <b>&lt;0.001</b> |
| <b>5 - Time * (Fish * Isolation) (Compared to model 4)</b>    | <b>10</b>                          | <b>210.6</b>    | <b>0.034</b>     |
| <i>1st Sampling Survey</i>                                    |                                    |                 |                  |
| 6 – Fish (Compared to no effect of treatments)                | 1                                  | 19.01           | 0.104            |
| 7 – Isolation (Compared to no effect of treatments)           | 2                                  | 22.45           | 0.497            |
| 8 – Fish * Isolation (Compared to no effect of treatments)    | 5                                  | 85.99           | 0.053            |
| <i>2nd Sampling Survey</i>                                    |                                    |                 |                  |
| <b>9 - Fish (Compared to no effect of treatments)</b>         | <b>1</b>                           | <b>62.28</b>    | <b>0.002</b>     |

|                                                                  |          |              |              |
|------------------------------------------------------------------|----------|--------------|--------------|
| <b>10 - Fish + Isolation (Compared model 9)</b>                  | <b>2</b> | <b>71.81</b> | <b>0.021</b> |
| <b>11 - Fish * Isolation (Compared model 10)</b>                 | <b>2</b> | <b>72.15</b> | <b>0.016</b> |
| <b>12 – (Fish * Isolation):Trophic Level (Compared model 11)</b> | <b>5</b> | <b>33.74</b> | <b>0.002</b> |

*3rd Sampling Survey*

|                                                                     |          |              |              |
|---------------------------------------------------------------------|----------|--------------|--------------|
| <b>13 – Fish (Compared to no effect of treatments)</b>              | <b>1</b> | <b>49.09</b> | <b>0.018</b> |
| 14 -Fish + Isolation (Compared to model 13)                         | 2        | 72.96        | 0.056        |
| <b>15 - Fish * Isolation (Compared model 13)</b>                    | <b>4</b> | <b>164.1</b> | <b>0.009</b> |
| <b>16 - (Fish * Isolation):Trophic Level (Compared to model 15)</b> | <b>5</b> | <b>33.71</b> | <b>0.028</b> |

---

**Figure 2.** Model-based unconstrained ordinations showing pond communities (symbols) and species (bubbles) in each of the three sampling surveys. Red bubbles are predatory-insects and blue bubbles are consumers. Size of bubbles are proportional to body size of each taxa (the volume of the largest individual of each species in a log-scale). A – First sampling survey; B – Second sampling survey; C – Third sampling Survey. Abbreviations of names of taxa provided in appendix 5.

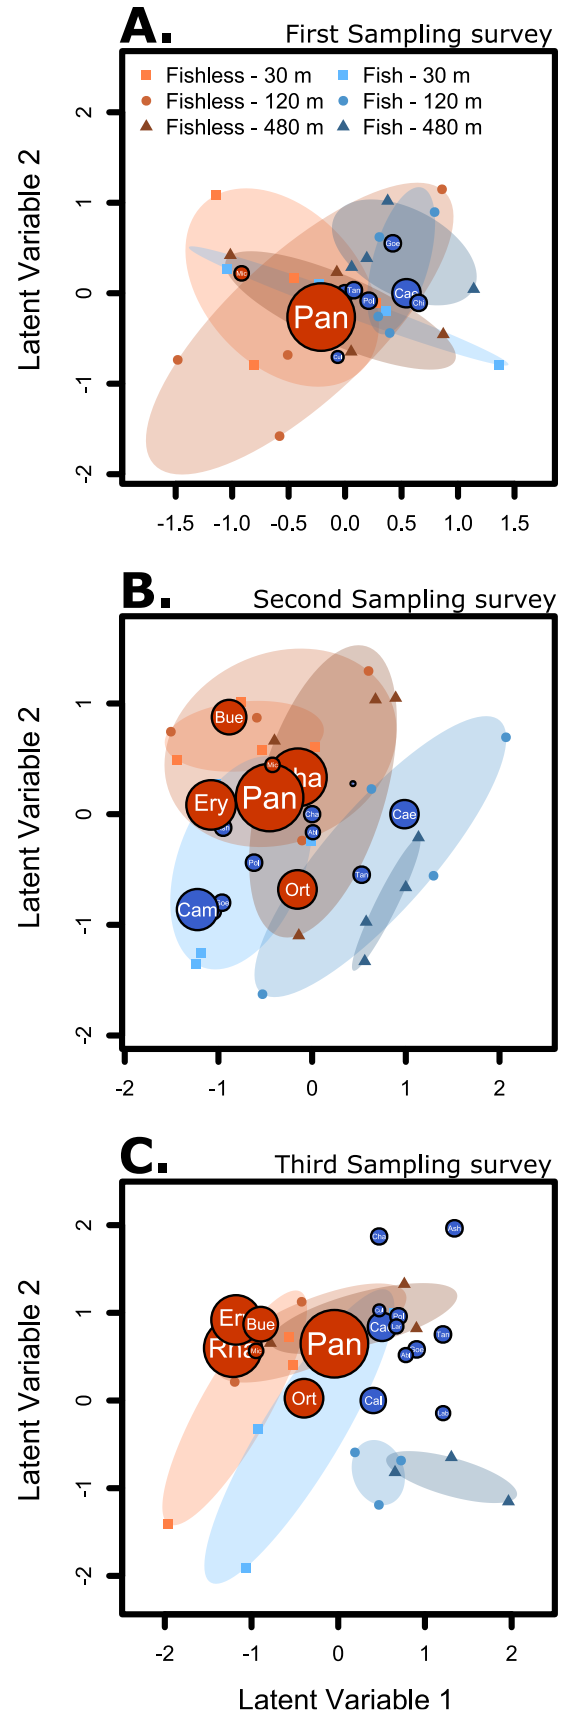



238 When we tested for differences in the size of the effect of fish on community structure, we  
239 found that the effect of fish at 480 m was bigger than at 30 m (Dif: 1.63; adj. p: 0.038 ). The size  
240 of effect of fish at 120 m was not significantly different from 30 m (Dif: 1.25; adj. p: 0.098) or  
241 480 m (Dif: 0.38; adj. p: 0.601).

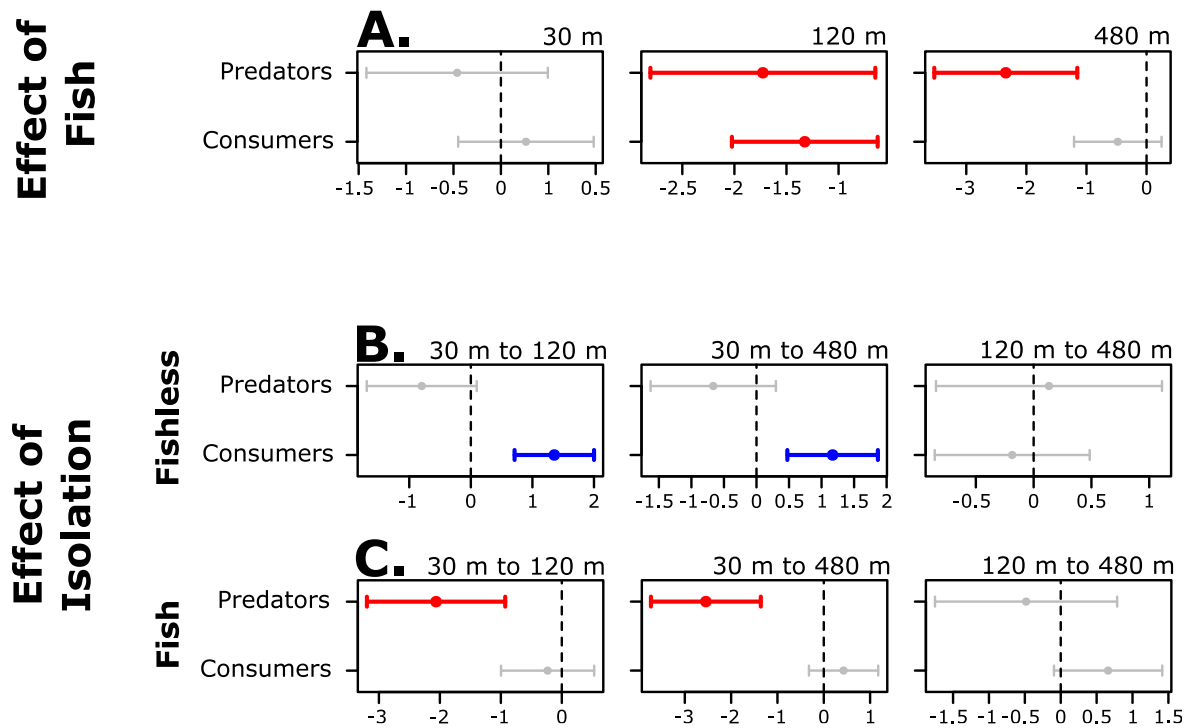

**Figure 3.** 95% Confidence intervals for the maximum likelihood estimates (MLE) of the effect of fish and isolation on abundance of predators and consumers when comparing pairs of treatments for the last survey. Confidence intervals not crossing the zero hatched line were considered significant effects and colored; blue bars represent an increase and red bars a decrease in abundance from the reference treatment. A are effects of the presence of fish in each isolation treatment. B are effects of isolation in fishless ponds and C in ponds with fish. In C and B we show effects of increasing isolation from 30 to 120 m, from 30 to 480 m, and from 120 m to 480 m. Similar results for the second sampling survey are available in appendix 10.

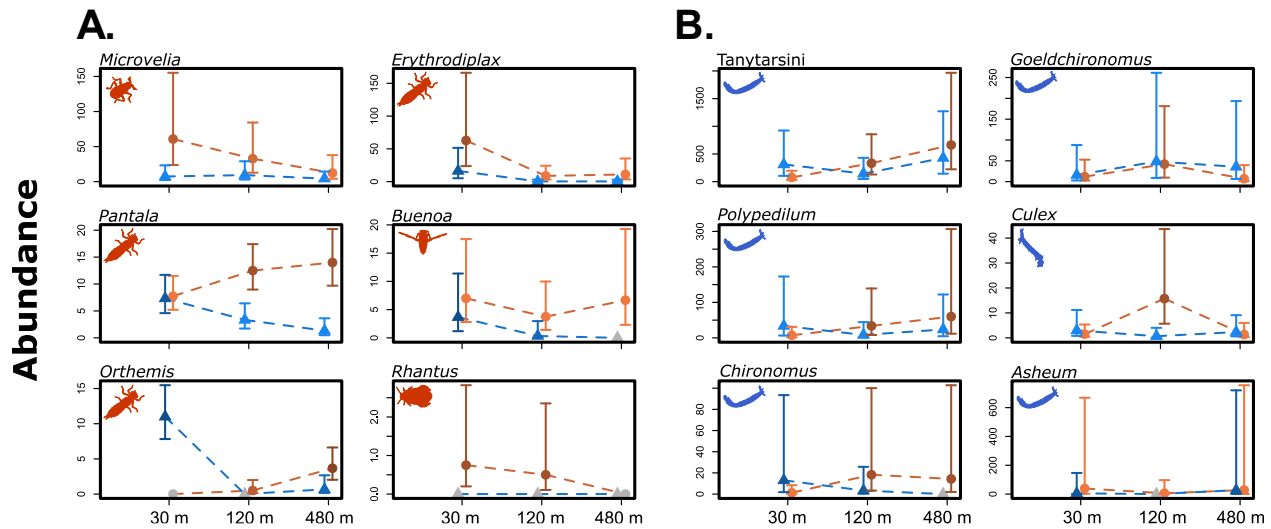

**Figure 4.** Maximum likelihood estimates (MLE) of abundance and their 95% confidence interval (for Model 16 in Table 1) of abundance for the six most abundant predatory taxa (A), and six most abundant consumer taxa (B), in the last sampling survey. Gray symbols indicate absolute absence (zero abundance) of a taxon in a treatment. Blue triangles are MLEs for fish treatments and orange balls are MLEs for fishless treatments. MLEs that are not contained inside the 95% confidence interval of other estimates were considered to be different. The actual estimated differences are provided in appendix 8. MLE of abundance for all species in the second and third sampling surveys are provided in appendix 6.

## 242 Discussion

243 Generally, both the presence of fish and spatial isolation had important effects on  
244 freshwater community structure. Specifically, responses to treatments were different for different  
245 trophic levels, as we expected, but we also found that some species are interesting exceptions for  
246 the predicted patterns. More importantly, the effects of fish and isolation are highly dependent on  
247 each other in ways that differ from those expected by classic metacommunity models (*e.g.*  
248 Mouquet & Loreau 2003; Leibold *et al.* 2004; Leibold & Chase 2018), but similar to what would

249 be expected for multitrophic metacommunities with variable dispersal rates among species  
250 (Vellend *et al.* 2014; Guzman *et al.* 2019).

251 We initially hypothesized that the presence of fish would change community structure by  
252 preferentially preying on more conspicuous predators, therefore increasing invertebrate  
253 consumer abundance through trophic cascades. We found that the presence of fish indeed shifts  
254 species composition through a reduction of predatory insects. The most negatively affected taxa  
255 were dytiscids beetles, notonectids and dragonfly larvae, all of them relatively large taxa (see  
256 appendix 5 and 7). We also observed an increase in the abundance of consumers, but only for the  
257 second sampling survey (see appendix 10). However, contrary to our expectations and previous  
258 works, this effect disappeared by the end of the experiment. Goyke & Hershey (1992) found that  
259 chironomid density was higher in lakes with trout because they were preying upon an important  
260 chironomid predator, the slimy sculpin fish. However, different from trout, tilapias are generalist  
261 omnivores and might prey not only upon most conspicuous prey, but also any available prey,  
262 including consumers. In fact, in a pilot experiment (appendix 2) Tilapias readily ate not only  
263 large conspicuous prey such as *Scinax* tadpoles, small fishes (*Phalloceros* sp.), belostomatids,  
264 nepids and dragonflies, but also much smaller ones, such as damselflies and mosquito larvae, the  
265 latter having about 5 orders of magnitude less wet mass than the manipulated Tilapias. For  
266 instance, (Diehl 1992) found that the presence of juvenile perch, a generalist benthic predator,  
267 caused biomass of invertebrate predators to decrease, but had no effect on the biomass of  
268 consumers, possibly because it was also preying upon consumers. The same process might have  
269 occurred in our experiment where consumers might suffer an effect that is a balance between  
270 direct negative effects of predation by fish, and indirect positive effects caused by the reduction  
271 of predatory insects also by fish (*i.e.* trophic cascade).

272 Most of the substantial changes in community structure that we observed because of spatial  
273 isolation were from low (30 m) to higher levels of isolation (120 m and 480 m). We  
274 hypothesized that a gradient in community structure should develop from low to high levels of  
275 habitat isolation, also due to trophic cascades. Specifically, the abundance of dispersal-limited  
276 predatory insects should decrease as spatial isolation increases, and the abundance of consumers  
277 should increase in response, as a cascade effect. We partially found support for this hypothesis.  
278 The indirect positive effect of isolation on consumers was only observed in fishless ponds, while  
279 the direct negative effect on predatory insects was only observed in ponds with fish. We believe  
280 that the lack of this effect in ponds with fish is also due to the fact that fish also prey upon  
281 consumers, especially in higher isolation treatments where the abundance of predators decreases  
282 as a consequence of spatial isolation. Indeed, if we consider predatory insect biomass as an  
283 estimate of food availability for fishes, we observe that average insect biomass per fishless pond  
284 decreases about 17% from low to intermediate and high isolation (19.2 g in low isolation to 15.9  
285 g in intermediate and high isolation). The lack of a negative effect of isolation on predatory  
286 insects in fishless ponds, however, might be explained by two clear exceptions to the expected  
287 patterns for predatory insects: *Pantala* and *Orthemis* dragonflies. Dragonflies are known to be  
288 good dispersers. Therefore, it is not surprising that at the scale of our experiment they would  
289 suffer small negative effects or no effect at all of spatial isolation (McCauley 2006). However,  
290 both of these dragonflies were positively affected by isolation in fishless ponds, while other  
291 predators, such as the *Erythrodiplax* dragonflies, diving beetles (*i.e. Rhantus*) and water striders  
292 (*i.e. Microvelia*) exhibited a strong decrease in abundance with spatial isolation. Therefore, we  
293 hypothesize that the absence of other predatory insects in more isolated ponds might have either

294 released those dragonflies from competition or made these ponds more attractive for adults to lay  
295 their eggs.

296 *Orthemis* dragonflies were also an exception for the expected negative effects of fish on  
297 predatory insects. They consistently had higher abundance in ponds with fish, but only in low  
298 isolation treatments. Some dragonfly species are known to exhibit different vulnerability to  
299 predation depending on body size and flexible antipredatory behavior, allowing them to coexist  
300 with fish (Johnson 1991; McPeck 1998; Johansson 2000; Hopper 2001; McCauley 2008).  
301 Indeed, *Orthemis* larvae was one of the smallest benthic predators we had in our experiment  
302 (around 20 times smaller than *Pantala*; see appendix 5) and it has been reported to occur in high  
303 abundance in aquaculture ponds with no vegetation (Marco *et al.* 1999). It is thus possible that  
304 higher availability of other suitable prey (*i.e.* other predatory insects) in low isolation decreased  
305 predation rate on *Orthemis*, allowing it to have a greater abundance in ponds with fish.

306 Classic metacommunity models predict that the effect of environmental filtering and local  
307 interactions on community structure should be stronger at intermediate levels of isolation since  
308 the flux of individuals would not be high enough to homogenize community structure (*i.e.* mass  
309 effects), nor low enough to allow communities to drift to different structures due to stochastic  
310 events. However, in our experiment, we observed an increase in the difference between ponds  
311 with and without fish with the increase of spatial isolation. Most common metacommunity  
312 models have two important assumptions that are often not true: First, species have the same  
313 dispersal rates; second, species are from the same trophic level, that is, competition would be  
314 much more important than predation in shaping community structure (Mouquet & Loreau 2003;  
315 Leibold *et al.* 2004). Our results are more aligned with multi-trophic metacommunities that  
316 consider interspecific variation in dispersal rates (*i.e.* Vellend *et al.* 2014; Guzman *et al.* 2019).

317 Because the species in our communities have different dispersal rates, isolation was not only a  
318 process that increases stochasticity in the frequency of species arrival (*i.e.* mean dispersal), but  
319 also an environmental filter that selects which taxa arrive first and more frequently. However,  
320 different from what we expected, the effects of fish and isolation were not fully correlated, and  
321 the observed increase in the difference between ponds with and without fish is not due to an  
322 increase in the consequences of local niche selection. Instead, isolation had different effects on  
323 ponds with and without fish. Specifically, fish prevented both consumers and dragonflies to  
324 increase in abundance with increasing isolation in ponds with fish.

325 Here we show that the Redbreast Tilapia, as any generalized fish predator, have direct  
326 negative effects on both predatory insects and consumers, dampening indirect positive effects of  
327 isolation on less dispersal limited taxa. Additionally, we show that considering multitrophic  
328 communities and variation in dispersal rates is important if we seek to understand patterns of  
329 biodiversity at regional scales. Of course, our experimental mesocosms consisted of simple  
330 habitats and previous work has shown that structural complexity can mitigate the effects of  
331 generalist fish predators (Diehl 1992). Although we did not explore this issue here, an important  
332 concern about the introduction of Tilapias is that large-bodied individuals are known to reduce  
333 macrophyte coverage in lakes (Rao *et al.* 2015). Thus, the results we observed here might be true  
334 even in more structurally complex habitats. It is also important to acknowledge that our results  
335 could be due to either consumptive (*i.e.* direct predation upon available prey) or non-  
336 consumptive effects of fish and other predatory insects (*i.e.* avoidance of ponds with fish or high  
337 density of predatory insects through habitat selection; see Binckley & Resetarits 2005; Blaustein  
338 *et al.* 2005; Resetarits 2005), or both. Although our experimental design does not allow us to  
339 tease apart those two specific processes, we nevertheless show how the presence of fish and

340 isolation changes community structure in a realistic and well controlled scenario. Finally, in  
341 accordance with other recent work (*e.g.* de Meutter *et al.* 2007; Vellend *et al.* 2014; Hill *et al.*  
342 2017; Guzman *et al.* 2019) our work provides strong evidence of how variation in dispersal rates  
343 can change the effects of isolation on community structure, especially when we consider multi-  
344 trophic metacommunities.

345

### 346 **Acknowledgements**

347 We thank the EESB staff for assistance in pond construction and Luis Vicente P. Cavalaro,  
348 Bianca S. Valente, Fernanda Simioni, Débora Negrão, Jessika Akane and Suzana Marte for  
349 assistance in the community sampling surveys. We thank Tadeu Siqueira and Paulo Inácio Prado  
350 for conceptual and statistical advice. We thank Victor Saito and Erika Shimabukuro for help with  
351 the identification of aquatic insects. We also thank Renata Pardini and Daniel Lahr for providing  
352 lab and office space. This study was funded by Fundação de Amparo à Pesquisa do Estado de  
353 São Paulo (FAPESP, grant #2015/18790-3) and Conselho Nacional de Desenvolvimento  
354 Científico e Tecnológico (CNPq, grant #458796/2014-0). RM was supported by Ph.D.  
355 fellowships from FAPESP (grants #2017/04122-4 and #2018/07714-2) and Coordenação de  
356 Aperfeiçoamento de Pessoal de Nível Superior (CAPES). Experiments were conducted in EESB  
357 under the authorization from Instituto Florestal (COTEC 553/2017) and collection permits from  
358 Instituto Chico Mendes de Conservação da Biodiversidade (ICMBIo 17559-6), following  
359 protocols approved by the Research Ethics Committee of the School of Arts, Sciences and  
360 Humanities of the University of São Paulo (CEUA 003/2016).

361

362 **Authorship:** RMP and LS conceived the project and designed the research. RMP collected the  
363 data, ran the analysis and wrote the first draft of the paper. MAL and LS contributed to revisions  
364 and conceptual manuscript development. All authors gave approval for publication.

365

## 366 **References**

367 Astorga, A., Oksanen, J., Luoto, M., Soininen, J., Virtanen, R. & Muotka, T. (2012). Distance  
368 decay of similarity in freshwater communities: do macro- and microorganisms follow the same  
369 rules? *Global Ecol Biogeogr*, 21, 365–375.

370

371 Bilton, D.T., Freeland, J.R. & Okamura, B. (2001). Dispersal in freshwater invertebrates. *Annu*  
372 *Rev Ecol Syst*, 32, 159–181.

373

374 Binckley, C.A. & Resetarits, W.J. (2005). Habitat selection determines abundance, richness and  
375 species composition of beetles in aquatic communities. *Biol Letters*, 1, 370–374.

376

377 Blaustein, L., Blaustein, J. & Chase, J. (2005). Chemical detection of the predator *Notonecta*  
378 *irrorata* by ovipositing *Culex* mosquitoes. *J Vector Ecol J Soc Vector Ecol*, 30, 299–301.

379

380 Britton, R.J. & Orsi, M. (2012). Non-native fish in aquaculture and sport fishing in Brazil:  
381 economic benefits versus risks to fish diversity in the upper River Paraná Basin. *Reviews in Fish*  
382 *Biology and Fisheries*, 22, 555–565.

383

384 Brown, A.M., Warton, D.I., Andrew, N.R., Binns, M., Cassis, G. & Gibb, H. (2014). The fourth-



385 corner solution – using predictive models to understand how species traits interact with the  
386 environment. *Methods Ecol Evol*, 5, 344–352.

387

388 Caulton, M.S. (1977). The effect of temperature on routine metabolism in *Tilapia rendalli*  
389 *boulenger*. *J Fish Biol*, 11, 549–553.

390

391 CEPAGRI. (2018). *Centro de Pesquisas Meteorológicas e Climáticas Aplicadas à Agricultura*.  
392 Available at: <https://www.cpa.unicamp.br/>. Last accessed 2018.

393

394 Chase, J.M. & Shulman, R.S. (2009). Wetland isolation facilitates larval mosquito density  
395 through the reduction of predators. *Ecological Entomology*, 34, 741–747.

396

397 Cohen, J.E., Jonsson, T. & Carpenter, S.R. (2003). Ecological community description using the  
398 food web, species abundance, and body size. *Proc National Acad Sci*, 100, 1781–1786.

399

400 Costa, J.M., Souza, L.O.I. de & Oldrini, B.B. (2004). Chave para identificação das famílias e  
401 gêneros das larvas conhecidas de odonata do brasil: comentários e registros bibliográficos  
402 (Insecta, Odonata). *Publicações Avulsas do Museu Nacional*, 99, 3–42.

403

404 Daga, V., Debona, T., Abilhoa, V., Gubiani, É. & Vitule, J. (2016). Non-native fish invasions of  
405 a Neotropical ecoregion with high endemism: a review of the Iguazu River. *Aquatic Invasions*,  
406 11, 209–223.

407

408 Diehl, S. (1992). Fish Predation and Benthic Community Structure: The Role of Omnivory and  
409 Habitat Complexity. *Ecology*, 73, 1646–1661.  
410  
411 FAO. (2019). *FAO - Fisheries and Aquaculture Information and Statistics Branch. Food and*  
412 *Agriculture Organization of the United Nations*. Available at:  
413 <http://www.fao.org/fishery/topic/16140/en>. Last accessed 2019.  
414  
415 Finlay, B.J., Monaghan, E.B. & Maberly, S.C. (2002). Hypothesis: The Rate and Scale of  
416 Dispersal of Freshwater Diatom Species is a Function of their Global Abundance. *Protist*, 153,  
417 261–273.  
418  
419 Goyke, A.P. & Hershey, A.E. (1992). Effects of fish predation on larval chironomid (Diptera:  
420 Chironomidae) communities in an arctic ecosystem. *Hydrobiologia*, 240, 203–211.  
421  
422 Guzman, L., Germain, R.M., Forbes, C., Straus, S., O'Connor, M.I., Gravel, D., *et al.* (2019).  
423 Towards a multi-trophic extension of metacommunity ecology. *Ecol Lett*, 22, 19–33.  
424  
425 Hamada, N., Nessimian, J.L. & Querino, R.B. (2014). *Insetos aquáticos na Amazônia brasileira:*  
426 *taxonomia, biologia e ecologia*. Editora do INPA. Editora do INPA. Manaus. pp 724.  
427  
428 Hein, A.M. & Gillooly, J.F. (2011). Predators, prey, and transient states in the assembly of  
429 spatially structured communities. *Ecology*, 92, 549–55.  
430

- 431 Hill, M.J., Heino, J., Thornhill, I., Ryves, D.B. & Wood, P.J. (2017). Effects of dispersal mode  
432 on the environmental and spatial correlates of nestedness and species turnover in pond  
433 communities. *Oikos*, 126, 1575–1585.
- 434
- 435 Hopper, K.R. (2001). Flexible antipredator behavior in a dragonfly species that coexists with  
436 different predator types. *Oikos*, 93, 470–476.
- 437
- 438 Howeth, J.G. & Leibold, M.A. (2008). Planktonic dispersal dampens temporal trophic cascades  
439 in pond metacommunities. *Ecology Letters*, 11, 245–257.
- 440
- 441 Hui, F.K., Warton, D.I., Ormerod, J.T., Haapaniemi, V. & Taskinen, S. (2016). Variational  
442 Approximations for Generalized Linear Latent Variable Models. *J Comput Graph Stat*, 0–0.
- 443
- 444 Hui, F., Taskinen, S., Pledger, S., Foster, S.D. & Warton, D.I. (2015). Model-based approaches  
445 to unconstrained ordination. *Methods in Ecology and Evolution*, 6, 399–411.
- 446
- 447 Johansson, F. (2000). The slow—fast life style characteristics in a suite of six species of odonate  
448 larvae. *Freshwater Biology*, 43, 149–159.
- 449
- 450 Johnson, D.M. (1991). Behavioral ecology of larval dragonflies and damselflies. *Trends in*  
451 *Ecology & Evolution*, 6, 8–13.
- 452
- 453 Leibold, M.A. & Chase, J.M. (2018). Metacommunity Ecology. *Princeton University Press*, 504.

454

455 Leibold, M., Holyoak, M., Mouquet, N., Amarasekare, P., Chase, J., Hoopes, M., *et al.* (2004).

456 The metacommunity concept: a framework for multi-scale community ecology. *Ecology Letters*,

457 7, 601–613.

458

459 Levins, R. & Culver, D. (1971). Regional Coexistence of Species and Competition between Rare

460 Species. *Proc National Acad Sci*, 68, 246–248.

461

462 Marco, D.P., Latini, A. & Reis, A. (1999). Environmental determination of dragonfly

463 assemblage in aquaculture ponds. *Aquac Res*, 30, 357–364.

464

465 McCann, K., Rasmussen, J. & Umpanhowar, J. (2005). The dynamics of spatially coupled food

466 webs. *Ecol Lett*, 8, 513–523.

467

468 McCauley, S.J. (2006). The effects of dispersal and recruitment limitation on community

469 structure of odonates in artificial ponds. *Ecography*, 29, 585–595.

470

471 McCauley, S.J. (2008). Slow, fast and in between: habitat distribution and behaviour of larvae in

472 nine species of libellulid dragonfly. *Freshwater Biology*, 53, 253–263.

473

474 McPeck, M.A. (1998). The consequences of changing the top predator in a food web: a

475 comparative experimental approach. *Ecological Monographs*, 68, 1–23.

476

- 477 Melo, A.C.G. de & Durigan, G. (2011). *Estação Ecológica de Santa Bárbara Plano de Manejo*.  
478 *Secretaria do Meio Ambiente*. Secretaria do Meio Ambiente.  
479
- 480 de Meutter, F., Meester, L. & Stoks, R. (2007). Metacommunity structure of pond  
481 macroinvertebrates: effects of dispersal mode and generation time. *Ecology*, 88, 1687–1695.  
482
- 483 Mouquet, N. & Loreau, M. (2003). Community Patterns in Source-Sink Metacommunities. *The*  
484 *American Naturalist*, 162, 544–557.  
485
- 486 Muehlbauer, J.D., Collins, S.F., Doyle, M.W. & Tockner, K. (2014). How wide is a stream?  
487 Spatial extent of the potential “stream signature” in terrestrial food webs using meta-analysis.  
488 *Ecology*, 95, 44–55.  
489
- 490 Niku, J., Brooks, W., Herliansyah, R., Hui, F., Taskinen, S. & Warton, D.I. (2019). gllvm:  
491 Generalized Linear Latent Variable Models. R package version 1.1.7.  
492 <https://github.com/JenniNiku/gllvm.git>  
493
- 494 Niku, J., Warton, D.I., Hui, F.K. & Taskinen, S. (2017). Generalized Linear Latent Variable  
495 Models for Multivariate Count and Biomass Data in Ecology. *Journal of Agricultural, Biological*  
496 *and Environmental Statistics*, 22, 498–522.  
497
- 498 Pelicice, F., Vitule, J., Junior, D., Orsi, M. & Agostinho, A. (2014). A Serious New Threat to  
499 Brazilian Freshwater Ecosystems: The Naturalization of Nonnative Fish by Decree.

500 *Conservation Letters*, 7, 55–60.

501

502 Pereira, D., de Melo, A.L. & Hamada, N. (2007). Chaves de identificação para famílias e gêneros  
503 de gerromorpha e nepomorpha (Insecta: Heteroptera) na Amazônia central. *Neotropical*  
504 *Entomology*, 36, 210–228.

505

506 Pope, K.L. & Hannelly, E.C. (2013). Response of benthic macroinvertebrates to whole-lake,  
507 non-native fish treatments in mid-elevation lakes of the Trinity Alps, California. *Hydrobiologia*,  
508 714, 201–215.

509

510 Rao, W., Ning, J., Zhong, P., Jeppesen, E. & Liu, Z. (2015). Size-dependent feeding of  
511 omnivorous Nile tilapia in a macrophyte-dominated lake: implications for lake management.  
512 *Hydrobiologia*, 749, 125–134.

513

514 R Core Team. (2019). R: A language and environment for statistical computing. R Foundation  
515 for Statistical Computing, Vienna, Austria. URL <https://www.R-project.org/>.

516

517 Resetarits, W.J. (2005). Habitat selection behaviour links local and regional scales in aquatic  
518 systems. *Ecol Lett*, 8, 480–486.

519

520 Segura, M., Valente-Neto, F., Fonseca-Gessner, A., de Carlos, B. & de Carlos, B. (2011). Chave  
521 de famílias de Coleoptera aquáticos (Insecta) do Estado de São Paulo, Brasil. *Biota Neotropica*,  
522 11, 393–412.

523

524 Shulman, R.S. & Chase, J.M. (2007). Increasing isolation reduces predator:prey species richness  
525 ratios in aquatic food webs. *Oikos*, 116, 1581–1587.

526

527 Shurin, J.B., Cottenie, K. & Hillebrand, H. (2009). Spatial autocorrelation and dispersal  
528 limitation in freshwater organisms. *Oecologia*, 159, 151–159.

529

530 Tran-Duy, A., Schrama, J.W., van Dam, A.A. & Verreth, J. (2008). Effects of oxygen  
531 concentration and body weight on maximum feed intake, growth and hematological parameters  
532 of Nile tilapia, *Oreochromis niloticus*. *Aquaculture*, 275, 152–162.

533

534 Vellend, M. (2010). Conceptual synthesis in community ecology. *The Quarterly review of*  
535 *biology*, 85, 183–206.

536

537 Vellend, M., vastava, D.S., Anderson, K.M., Brown, C.D., Jankowski, J.E., Kleynhans, E.J., *et*  
538 *al.* (2014). Assessing the relative importance of neutral stochasticity in ecological communities.  
539 *Oikos*, 123, 1420–1430.

540

541 Wang, Y., Naumann, U., Eddelbuettel, D., Wilshire, J. & Warton, D. (2019). mvabund:  
542 Statistical Methods for Analysing Multivariate Abundance Data. R package version 4.0.1.  
543 <https://CRAN.R-project.org/package=mvabund>

544

545 Wang, Y., Naumann, U., Wright, S.T. & Warton, D.I. (2012). mvabund– an R package for

546 model-based analysis of multivariate abundance data. *Methods in Ecology and Evolution*, 3,  
547 471–474.

548

549 Warton, D.I., Foster, S.D., De'ath, G., Stoklosa, J. & Dunstan, P.K. (2015a). Model-based  
550 thinking for community ecology. *Plant Ecology*, 216, 669–682.

551

552 Warton, D.I., Shipley, B. & Hastie, T. (2015b). CATS regression – a model-based approach to  
553 studying trait-based community assembly. *Methods Ecol Evol*, 6, 389–398.

554

555 Warton, D.I., Thibaut, L. & Wang, Y. (2017). The PIT-trap—A “model-free” bootstrap  
556 procedure for inference about regression models with discrete, multivariate responses. *PLOS*  
557 *ONE*, 12, e0181790.

558

559 Wellborn, G.A., Skelly, D.K. & Werner, E.E. (1996). Mechanisms creating community structure  
560 across a freshwater habitat gradient. *Annual Review of Ecology and Systematics*, 27, 337–363.

561

562 Zambrano, L., Martínez-Meyer, E., Menezes, N. & Peterson, T.A. (2006). Invasive potential of  
563 common carp (*Cyprinus carpio*) and Nile tilapia (*Oreochromis niloticus*) in American freshwater  
564 systems. *Canadian Journal of Fisheries and Aquatic Sciences*, 63, 1903–1910.

565
